# Supplementary material
Source: PubMed Central journal article supplement (PMC8608247)
Supplement: NIHMS1737210-supplement-1.pdf [file NIHMS1737210-supplement-1.pdf]

**Figure E1.** CONSORT diagram showing study population selection.

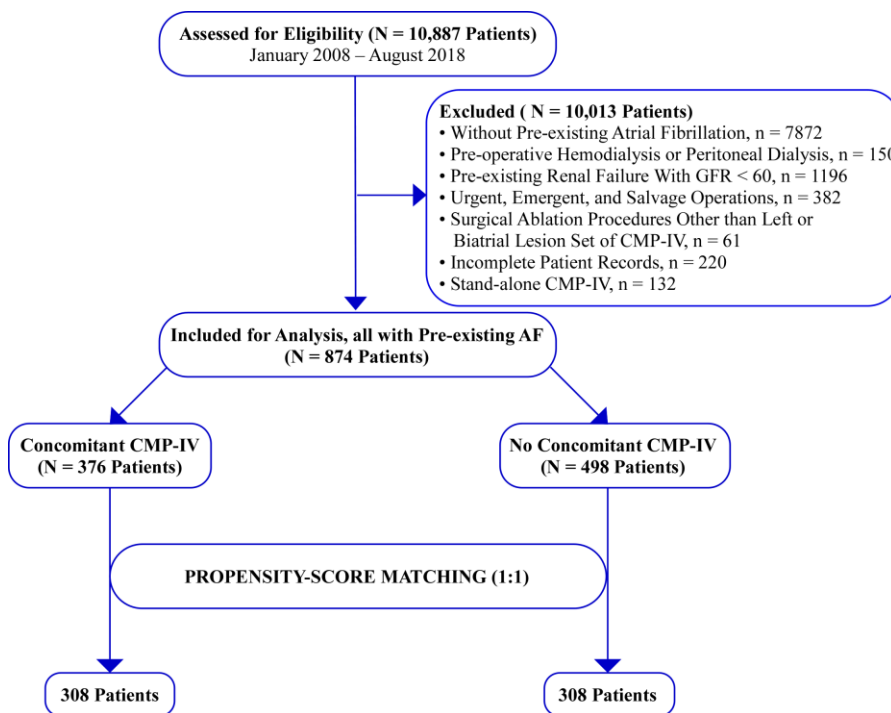

*CMP-IV*, Cox-Maze IV; *GFR*, Glomerular filtration rate.

**Figure E2.** Distribution of propensity scores between concomitant CMP-IV (blue) and no AF surgery (red) groups, before and after matching.

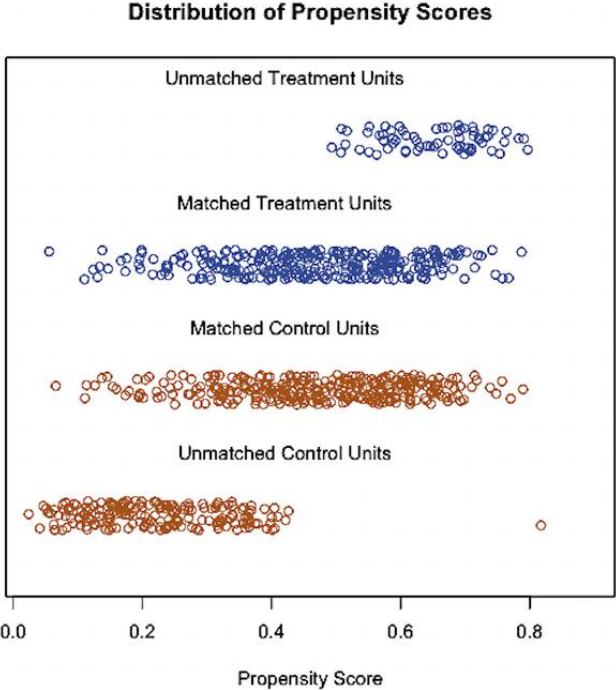

**Figure E3.** Kaplan-Meier depiction of late survival for patients who underwent no AF surgery stratified by new onset postoperative AKI with 95% confidence intervals: no AKI after surgery (blue) and AKI after surgery (red) ( $P=0.014$ ).

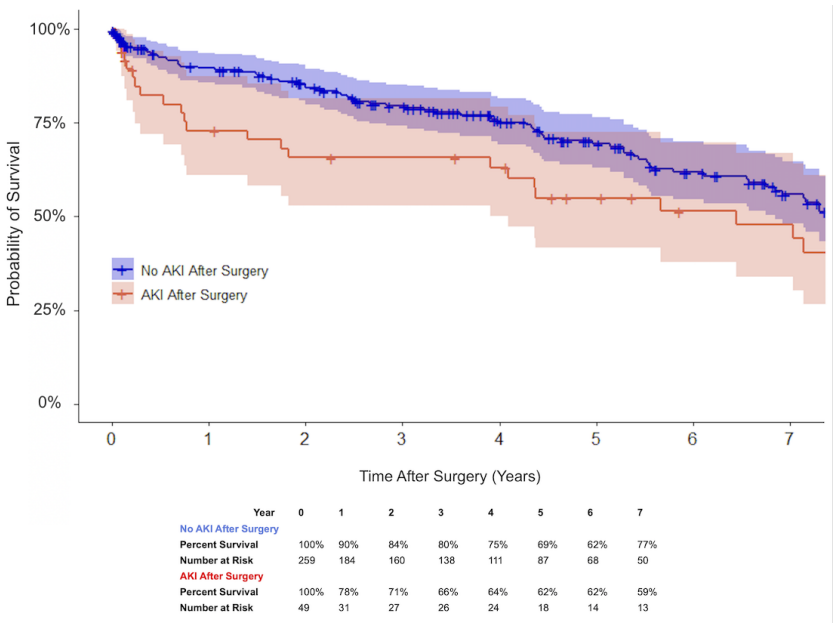

*AF*, atrial fibrillation; *AKI*, acute kidney injury.

**Supplementary Tables:**

**Table E1. Cox-Maze Lesion Set Subgroup Analysis**

| <b>Variable</b>                                        | <b>Biatrial CMP-IV<br/>Lesion Set n=277</b> | <b>Left Sided CMP-IV<br/>Lesion Set n=31</b> | <b>P-value</b> |
|--------------------------------------------------------|---------------------------------------------|----------------------------------------------|----------------|
| CPB time (mins)                                        | 182 [158-213]                               | 156 [132-188]                                | 0.002          |
| Aortic Cross-Clamp Time (mins)                         | 94 [75-112]                                 | 96 [81-117]                                  | 0.242          |
| <b>AKI Threshold</b>                                   |                                             |                                              |                |
| AKI                                                    | 90 (32%)                                    | 9 (29%)                                      | 0.697          |
| Renal Failure                                          | 18 (6%)                                     | 1 (3%)                                       | 0.475          |
| Dialysis                                               | 14 (5%)                                     | 0 (0%)                                       | 0.202          |
| Relative increase in serum creatinine<br>from baseline | 1.27 [1.11-1.57]                            | 1.20 [1.02-1.50]                             | 0.230          |
| Postoperative GFR (mL/min/1.73m <sup>3</sup> )         | 60 [45-73]                                  | 63 [46-74]                                   | 0.699          |

Values are n (%) or median with interquartile range [IQR], unless otherwise indicated. *AF*, atrial fibrillation; *AKI*, acute kidney injury; *CMP-IV*, Cox-Maze IV procedure; *CPB*, cardiopulmonary bypass; *GFR*, glomerular filtration rate.

**Table E2. Type of Concomitant Procedures**

| <b>Concomitant Operation</b>   | <b>No AF Surgery<br/>n=308</b> | <b>Concomitant CMP-IV<br/>n=308</b> |
|--------------------------------|--------------------------------|-------------------------------------|
| CABG                           | 26 (8%)                        | 40 (13%)                            |
| AVR ± CABG                     | 132 (43%)                      | 51 (17%)                            |
| MV Repair or Replacement ± AVR | 106 (35%)                      | 182 (59%)                           |
| Other                          | 44 (14%)                       | 35 (11%)                            |

Values are n (%) unless otherwise indicated. *AF*, atrial fibrillation; *AVR*, aortic valve replacement; *CABG*, coronary artery bypass graft; *CMP-IV*, Cox-Maze IV procedure; *MV*, mitral valve.
